# Supplementary material for: Cytotoxic and Anti-Plasmodial Activities of Stephania dielsiana Y.C. Wu Extracts and the Isolated Compounds
Source: PubMed Central journal article supplement (PMC7465040; doi:10.3390/molecules25163755), 2020-08-18
Supplement: molecules-25-03755-s001.pdf [file molecules-25-03755-s001.pdf]

## Supplementary Material

### Cytotoxic and Anti-plasmodial Activities of *Stephania dielsiana* Y.C. Wu extracts and the Isolated Compounds

James Knockleby<sup>1,2</sup>, Bruno Pradines<sup>3,4,5,6</sup>, Mathieu Gendrot<sup>3,4,5</sup>, Joel Mosnier<sup>3,4,5,6</sup>, Thanh Tam Nguyen<sup>7</sup>, Thi Thuy Trinh<sup>7</sup>, Hoyun Lee<sup>1,8\*</sup> and Phuong Mai Le<sup>9\*</sup>

<sup>1</sup> Health Science North Research Institute, 56 Walford Road, Sudbury, ON P3E 2H2, Canada; jknockleby@hsnri.ca

<sup>2</sup> Department of Chemistry and Biochemistry, Laurentian University, 935 Ramsey Lake Road, Sudbury, ON P3E 2C6, Canada

<sup>3</sup> Département Microbiologie et Maladies Infectieuses, Institut de Recherche Biomédicale des Armées, 13005 Marseille, France; bruno.pradines@gmail.com (B.P.); ma.gendrot@laposte.net (M.G.); joelmosnier@orange.fr (J.M.)

<sup>4</sup> Aix Marseille University, IRD, SSA, AP-HM, VITROME, 13005 Marseille, France

<sup>5</sup> IHU Méditerranée Infection, 13005 Marseille, France

<sup>6</sup> Centre National de Référence du Paludisme, Institut de Recherche Biomédicale des Armées, 13005 Marseille, France

<sup>7</sup> Graduate University of Science and Technology and Institute of Chemistry, Vietnam Academy of Science and Technology, 18 Hoang Quoc Viet Road, 70750 Hanoi, Vietnam; nttam76@yahoo.com (T.T.N.); thuy@ich.vast.vn (T.T.T.)

<sup>8</sup> Departments of Medicine, University of Ottawa Medical School, Ottawa, ON K1H 5M8, Canada

<sup>9</sup> National Research Council Canada, 100 Sussex Drive, Ottawa, ON K1A 0R6, Canada

\* Correspondence: hlee@hsnri.ca (H.L.); PhuongMai.Le@nrc-cnrc.gc.ca (P.M.L.); Tel.: 1 705 523 7300 (H.L.); 1 613 991 9406 (P.M.L.)

Received: 30 July 2020; Accepted: 13 August 2020; Published: date

List of Tables: Table S1: <sup>1</sup>H-NMR data of the isolated compounds **1** – **7** from *Stephania dielsiana* (500 MHz,  $\delta$ , ppm, J/Hz)

Table S2: <sup>13</sup>C-NMR data of the isolated compounds **1** – **7** from *Stephania dielsiana* (125 MHz,  $\delta$ , ppm)

Table S1. <sup>1</sup>H-NMR data of the isolated compounds **1** – **7** from *Stephania dielsiana* (500 MHz, δ, ppm, J/Hz)

| Position | <b>1<sup>a</sup></b>         | <b>2<sup>b</sup></b>            | <b>3<sup>c</sup></b>                                                        | <b>4<sup>c</sup></b>                                                        | <b>5<sup>b</sup></b>                                     | Position | <b>6<sup>a</sup></b>         | <b>7<sup>c</sup></b>                                           |
|----------|------------------------------|---------------------------------|-----------------------------------------------------------------------------|-----------------------------------------------------------------------------|----------------------------------------------------------|----------|------------------------------|----------------------------------------------------------------|
|          | δ <sub>H</sub>               | δ <sub>H</sub>                  | δ <sub>H</sub>                                                              | δ <sub>H</sub>                                                              | δ <sub>H</sub>                                           |          | δ <sub>H</sub>               | δ <sub>H</sub>                                                 |
| 1        |                              |                                 |                                                                             |                                                                             |                                                          | 1        | 7.45 (1H, s)                 | 6.74 (1H, s)                                                   |
| 3        | 7.46 (1H, s)                 | 7.63 (1H, s)                    | 6.55 (1H, s)                                                                | 6.52 (1H, s)                                                                | 6.65 (1H, s)                                             | 3        |                              |                                                                |
| 3a       |                              |                                 |                                                                             |                                                                             |                                                          | 4        | 6.74 (1H, s)                 | 6.62 (1H, s)                                                   |
| 4        | 7.91 (1H, d, <i>J</i> = 5.0) | 8.39 (1H, d, <i>J</i> = 6.5 Hz) | 3.14 – 3.03 (m*)<br>2.62 (1H, dd, <i>J</i> = 16.0, 3.5)                     | 3.16-3.03 (m*)<br>2.62 (1H, dd, <i>J</i> = 16.0, 3.5)                       | 3.35-3.28 (1H, m)<br>2.98 (1H, dd, <i>J</i> = 17.5, 4.0) | 4a       |                              |                                                                |
| 5        | 8.73 (1H, d, <i>J</i> = 5.0) | 8.73 (1H, d, <i>J</i> = 6.5 Hz) | 3.14-3.03 (m*)<br>2.51 (1H, dd, <i>J</i> = 11.5, 3.5)                       | 3.16-3.03 (m*)<br>2.52 (1H, dd, <i>J</i> = 11.5, 3.5)                       | 3.81-3.78 (m*)<br>3.54 (1H, dt, <i>J</i> = 12.5, 4.5)    | 5        | 3.24 (3H, t, <i>J</i> = 6.5) | 3.12 (1H, m)<br>2.62 (m*)                                      |
| 6a       |                              |                                 | 3.14-3.03 (m*)                                                              | 3.16-3.03 (m*)                                                              | 4.33-4.31 (1H, m)                                        | 6        | 5.02 (1H, <i>J</i> = 6.5)    | 3.20(1H, m)<br>2.62 (m*)                                       |
| 6b       |                              |                                 |                                                                             |                                                                             |                                                          | 8        | 9.88 (1H, s)                 | 4.24 (1H, d, <i>J</i> = 15.5)<br>3.52 (1H, d, <i>J</i> = 15.5) |
| 7        |                              |                                 | 3.68 (1H, dd, <i>J</i> = 15.0, 4.5)<br>2.20 (1H, dd, <i>J</i> = 14.5, 14.0) | 3.67 (1H, dd, <i>J</i> = 14.5, 4.5)<br>2.29 (1H, dd, <i>J</i> = 14.5, 14.0) | 3.81-3.78 (m*)<br>2.98 (1H, dd, <i>J</i> = 14.5, 14.0)   | 8a       |                              |                                                                |
| 8        |                              |                                 |                                                                             |                                                                             | 7.83 (1H, d, <i>J</i> = 8.5)                             | 10       |                              |                                                                |

|                     |                          |                            |                                                      |                                                      |                                                |                     |                          |                                                                     |
|---------------------|--------------------------|----------------------------|------------------------------------------------------|------------------------------------------------------|------------------------------------------------|---------------------|--------------------------|---------------------------------------------------------------------|
| 9                   | 7.26 (1H, $J = 8.5$ Hz)  | 7.34 (1H, d, $J = 8.5$ Hz) | 6.83 (1H, d, $J = 8.0$ )                             |                                                      | 6.99 (1H, $J = 8.5$ )                          | 11                  | 7.71 (1H, d, $J = 9.0$ ) | 6.79 (1H, dd, $J = 8.5$ )                                           |
| 10                  | 7.75 (1H, t, $J = 8.0$ ) | 7.82 (1H, t, $J = 8.0$ Hz) | 7.26 (1H, dd, $J = 8.0, 8.0$ )                       | 6.87 (1H, d, $J = 8.5$ )                             |                                                | 12                  | 7.91 (1H, d, $J = 9.0$ ) | 6.88 (1H, dd, $J = 8.5$ )                                           |
| 11                  | 8.27 (1H, d, $J = 8.0$ ) | 8.30 (1H, d, $J = 8.0$ Hz) | 7.71 (1H, d, $J = 8.0$ )                             | 7.80 (1H, d, $J = 8.5$ )                             |                                                | 12a                 |                          |                                                                     |
| 11a                 |                          |                            |                                                      |                                                      |                                                | 13                  | 8.55 (1H, s)             | 3.36 (1H, dd, $J = 16.0, 4.0$ )<br>2.83 (1H, dd, $J = 15.5, 11.5$ ) |
| 11b                 |                          |                            |                                                      |                                                      |                                                | 13a                 |                          | 3.52 (1H, m)                                                        |
| 12                  | 6.44 (2H, s)             | 6.66 (2H, s)               | 6.08 (1H, d, $J = 1.5$ )<br>5.90 (1H, d, $J = 1.5$ ) | 6.05 (1H, d, $J = 1.5$ )<br>5.90 (1H, d, $J = 1.5$ ) | 6.11 (1H, $J = 1.0$ )<br>5.97 (1H, $J = 1.0$ ) | 13b                 |                          |                                                                     |
| NCH <sub>3</sub>    |                          | 4.72 (3H, s)               | 2.57 (3H, s)                                         | 2.58 (3H, s)                                         | 3.18 (3H, s)                                   | 2-OCH <sub>3</sub>  | 4.05 (3H, s)             | 3.89 (3H, s)                                                        |
| 8-OCH <sub>3</sub>  | 3.96 (3H, s)             | 4.05 (3H, s)               | 3.85 (3H, s)                                         | 3.82 (3H, s)                                         |                                                | 3-OCH <sub>3</sub>  | 3.96 (3H, s)             | 3.86 (3H, s)                                                        |
| 9-OCH <sub>3</sub>  |                          |                            |                                                      | 3.93 (3H, s)                                         |                                                | 9-OCH <sub>3</sub>  | 4.18 (3H, s)             | 3.87 (3H, s)                                                        |
| 10-OCH <sub>3</sub> |                          |                            |                                                      |                                                      | 3.88 (3H, s)                                   | 10-OCH <sub>3</sub> | 3.99 (3H, s)             | 3.85 (3H, s)                                                        |
| 11-OCH <sub>3</sub> |                          |                            |                                                      |                                                      | 3.86 (3H, s)                                   |                     |                          |                                                                     |

<sup>a</sup> Measured in DMSO-d<sub>6</sub>. <sup>b</sup> Measured in CD<sub>3</sub>OD. <sup>c</sup> Measured in CDCl<sub>3</sub>. \* Overlapped signals.

Table S2. <sup>13</sup>C-NMR data of the isolated compounds **1** – **7** from *Stephania dielsiana* (125 MHz, δ, ppm)

| Positions           | <b>1<sup>a</sup></b> | <b>2<sup>b</sup></b> | <b>3<sup>c</sup></b> | <b>4<sup>c</sup></b> | <b>5<sup>b</sup></b> | Positions           | <b>6<sup>a</sup></b> | <b>7<sup>c</sup></b> |
|---------------------|----------------------|----------------------|----------------------|----------------------|----------------------|---------------------|----------------------|----------------------|
|                     | δ <sub>c</sub>       | δ <sub>c</sub>       | δ <sub>c</sub>       | δ <sub>c</sub>       | δ <sub>c</sub>       |                     | δ <sub>c</sub>       | δ <sub>c</sub>       |
| 1                   | 151.22               | 159.10               | 142.72               | 142.12               | 144.61               | 1                   | 108.34               | 108.63               |
| 2                   | 147.37               | 153.13               | 146.65               | 146.65               | 150.01               | 2                   | 149.43               | 147.56               |
| 3                   | 102.58               | 104.20               | 107.55               | 106.83               | 107.77               | 3                   | 152.09               | 147.47               |
| 3a                  | 134.47               | 141.79               | 126.45               | 126.43               | 120.69               | 4                   | 110.67               | 111.38               |
| 4                   | 122.89               | 126.71               | 29.16                | 29.02                | 26.90                | 4a                  | 128.00               | 126.65               |
| 5                   | 143.76               | 142.07               | 53.66                | 53.60                | 53.84                | 5                   | 27.09                | 28.91                |
| 6a                  | 145.79               | 142.59               | 61.84                | 61.89                | 62.99                | 6                   | 56.23                | 51.42                |
| 6b                  | 121.06               | 124.54               | 127.17               | 126.43               | 124.99               | 8                   | 145.62               | 53.87                |
| 7                   | 179.69               | 179.23               | 25.96                | 26.84                | 25.41                | 8a                  | 121.87               | 127.56               |
| 7a                  | 120.27               | 120.96               | 123.79               | 129.68               | 126.76               | 9                   | 144.46               | 145.07               |
| 8                   | 160.87               | 162.83               | 156.25               | 152.07               | 124.73               | 10                  | 150.23               | 150.28               |
| 9                   | 112.77               | 114.43               | 109.69               | 145.90               | 112.84               | 11                  | 126.11               | 111.05               |
| 10                  | 134.18               | 137.75               | 127.06               | 110.34               | 153.88               | 12                  | 123.46               | 123.82               |
| 11                  | 118.85               | 120.47               | 119.47               | 123.12               | 147.13               | 12a                 | 133.48               | 128.35               |
| 11a                 | 134.27               | 134.39               | 132.16               | 124.61               | 124.51               | 13                  | 120.01               | 36.12                |
| 11b                 | 106.76               | 109.69               | 116.58               | 116.54               | 117.59               | 13a                 | 137.85               | 59.26                |
| 12                  | 102.38               | 106.69               | 100.64               | 100.64               | 102.77               | 13b                 | 118.77               | 129.44               |
| NCH <sub>3</sub>    | -                    | 50.04                | 43.96                | 43.82                | 42.22                | 2-OCH <sub>3</sub>  | 56.75                | 56.07                |
| 8-OCH <sub>3</sub>  | 55.87                | 56.89                | 55.59                | 60.72                | -                    | 3-OCH <sub>3</sub>  | 56.23                | 55.86                |
| 9-OCH <sub>3</sub>  | -                    | -                    | -                    | 55.78                | -                    | 9-OCH <sub>3</sub>  | 62.32                | 60.15                |
| 10-OCH <sub>3</sub> | -                    | -                    | -                    | -                    | 56.40                | 10-OCH <sub>3</sub> | 56.88                | 55.82                |
| 11-OCH <sub>3</sub> | -                    | -                    | -                    | -                    | 61.19                |                     |                      |                      |

<sup>a</sup> Measured in DMSO-d<sub>6</sub>. <sup>b</sup> Measured in CD<sub>3</sub>OD. <sup>c</sup> Measured in CDCl<sub>3</sub>.
